# Supplementary material
Source: publisher site journal article supplement (https://cdn.jamanetwork.com/ama/content_public/journal/psych/936028/yoi160094supp1_prod.pdf)
Supplement: Supplementary file 1 [file yoi160094supp1_prod.pdf]

## Supplementary Online Content

Keyes KM, Platt J, Kaufman AS, McLaughlin KA. Association of fluid intelligence and psychiatric disorders in a population-representative sample of US adolescents. *JAMA Psychiatry*. Published online December 28, 2016. doi:10.1001/jamapsychiatry.2016.3723

**eTable 1.** Sample sizes for each disorder group used in the analysis, separating current disorders into those with onset in the past 12 months and those with onset prior to the past 12 months

**eTable 2.** Unadjusted mean differences in IQ by psychiatric disorder among US adolescents (N=10,073)

**eTable 3.** Effect size estimates of the association between fluid intelligence and psychiatric disorders in a population representation sample of adolescents (N=10,073)

**eTable 4.** Variation in fluid intelligence by current disorder status, separating current disorders into those with onset in the past 12 months and those with onset prior to the past 12 months

**eTable 5.** Variation in fluid intelligence as a function of lifetime psychiatric disorders (N=10,073)

**eTable 6.** Proportion of adolescents with fluid intelligence in low, middle, and high range, separating current disorders into those with onset in the past 12 months and those with onset prior to the past 12 months

**eTable 7.** Unadjusted mean differences in IQ by psychiatric disorder among US adolescents by disorder age of onset

**eTable 8.** Proportion of adolescents with fluid intelligence in low, middle, and high range as a function of psychiatric disorder age of onset (unadjusted) (N=10,073)

**eTable 9.** Adjusted IQ differences as a function of psychiatric disorder age of onset in a population representation sample of adolescents (N=10,073)

This supplementary material has been provided by the authors to give readers additional information about their work.

| eTable 1. Sample sizes for each disorder group used in the analysis, separating current disorders into those with onset in the past 12 months and those with onset prior to the past 12 months |                                                            |         |            |          |                                                                |         |            |          |
|------------------------------------------------------------------------------------------------------------------------------------------------------------------------------------------------|------------------------------------------------------------|---------|------------|----------|----------------------------------------------------------------|---------|------------|----------|
|                                                                                                                                                                                                | <i>Past 12 month and prior to past 12 months, all ages</i> |         |            |          | <i>Past 12-month but not prior to past 12 months, all ages</i> |         |            |          |
|                                                                                                                                                                                                | Total                                                      | Low (%) | Middle (%) | High (%) | Total                                                          | Low (%) | Middle (%) | High (%) |
| <i>I. Fear disorders</i>                                                                                                                                                                       |                                                            |         |            |          |                                                                |         |            |          |
| Specific phobia                                                                                                                                                                                | 1600                                                       | 360     | 1042       | 198      | 21                                                             | 5       | 16         | --       |
| Agoraphobia                                                                                                                                                                                    | 217                                                        | 55      | 126        | 36       | 5                                                              | 3       | 2          | --       |
| Social phobia                                                                                                                                                                                  | 1273                                                       | 256     | 848        | 169      | --                                                             | --      | --         | --       |
| Panic disorder                                                                                                                                                                                 | 191                                                        | 35      | 136        | 20       | --                                                             | --      | --         | --       |
| No lifetime fear disorder                                                                                                                                                                      | 7164                                                       | 1249    | 4824       | 1091     | 7164                                                           | 1249    | 4824       | 1091     |
| <i>II. Distress disorders</i>                                                                                                                                                                  |                                                            |         |            |          |                                                                |         |            |          |
| Separation anxiety disorder                                                                                                                                                                    | 162                                                        | 42      | 107        | 13       | 12                                                             | 4       | 7          | 1        |
| Post-traumatic stress disorder                                                                                                                                                                 | 288                                                        | 50      | 194        | 44       | 11                                                             | 3       | 7          | 1        |
| Major depressive episode/dysthymia                                                                                                                                                             | 949                                                        | 182     | 638        | 129      | 47                                                             | 12      | 32         | 3        |
| Generalized anxiety disorder                                                                                                                                                                   | 176                                                        | 41      | 111        | 24       | 11                                                             | 3       | 7          | 1        |
| No lifetime distress disorder                                                                                                                                                                  | 4473                                                       | 818     | 3036       | 619      | 4473                                                           | 818     | 3036       | 619      |
| <i>III. Behavior disorders</i>                                                                                                                                                                 |                                                            |         |            |          |                                                                |         |            |          |
| ADHD                                                                                                                                                                                           | 247                                                        | 70      | 149        | 28       | 2                                                              | 1       | 1          | --       |
| Oppositional defiant disorder                                                                                                                                                                  | 488                                                        | 113     | 328        | 47       | 49                                                             | 10      | 32         | 7        |
| Conduct disorder                                                                                                                                                                               | 333                                                        | 90      | 216        | 27       | 91                                                             | 17      | 67         | 7        |
| Eating disorders                                                                                                                                                                               | 311                                                        | 76      | 195        | 40       | --                                                             | --      | --         | --       |
| No lifetime behavior disorder                                                                                                                                                                  | 8103                                                       | 1401    | 5483       | 1219     | 8103                                                           | 1401    | 5483       | 1219     |
| <i>IV. Substance disorders</i>                                                                                                                                                                 |                                                            |         |            |          |                                                                |         |            |          |
| Alcohol abuse                                                                                                                                                                                  | 504                                                        | 110     | 344        | 50       | 42                                                             | 11      | 26         | 5        |
| Drug abuse                                                                                                                                                                                     | 548                                                        | 107     | 376        | 65       | 100                                                            | 15      | 76         | 9        |
| No lifetime substance disorder                                                                                                                                                                 | 8912                                                       | 1620    | 5951       | 1341     | 8912                                                           | 1620    | 5951       | 1341     |
| <i>V. Other disorders</i>                                                                                                                                                                      |                                                            |         |            |          |                                                                |         |            |          |
| Bipolar disorder                                                                                                                                                                               | 113                                                        | 32      | 69         | 12       | 5                                                              | 1       | 3          | 1        |
| No lifetime bipolar disorder                                                                                                                                                                   | 8831                                                       | 1591    | 5905       | 1335     | 8831                                                           | 1591    | 5905       | 1335     |

| eTable 2. Unadjusted mean differences in IQ by psychiatric disorder among US adolescents (N=10,073)                                                                                                                                                                      |                                          |      |                      |                                                                  |      |                      |
|--------------------------------------------------------------------------------------------------------------------------------------------------------------------------------------------------------------------------------------------------------------------------|------------------------------------------|------|----------------------|------------------------------------------------------------------|------|----------------------|
|                                                                                                                                                                                                                                                                          | <i>Past 12 month disorders, all ages</i> |      |                      | <i>Prior to past 12-month but not current disorder, all ages</i> |      |                      |
|                                                                                                                                                                                                                                                                          | Mean IQ                                  | SD   | p value <sup>+</sup> | Mean IQ                                                          | SD   | p value <sup>+</sup> |
| <i>I. Fear disorders</i>                                                                                                                                                                                                                                                 |                                          |      |                      |                                                                  |      |                      |
| Specific phobia                                                                                                                                                                                                                                                          | 96.6                                     | 16.4 | 0.004                | 99.9                                                             | 14.3 | 0.91                 |
| Agoraphobia                                                                                                                                                                                                                                                              | 97.3                                     | 14.8 | 0.002                | 97.8                                                             | 15.4 | 0.47                 |
| Social phobia                                                                                                                                                                                                                                                            | 98.4                                     | 14.6 | 0.004                | 98                                                               | 15.4 | 0.47                 |
| Panic disorder                                                                                                                                                                                                                                                           | 97.9                                     | 13.9 | 0.10                 | 96.8                                                             | 14.3 | 0.47                 |
| No fear disorder                                                                                                                                                                                                                                                         | 100.1                                    | 14.5 | --                   | 100.1                                                            | 14.5 | --                   |
| <i>II. Distress disorders</i>                                                                                                                                                                                                                                            |                                          |      |                      |                                                                  |      |                      |
| Separation anxiety disorder                                                                                                                                                                                                                                              | 95                                       | 14.5 | 0.30                 | 97                                                               | 14.6 | 0.002                |
| Post-traumatic stress disorder**                                                                                                                                                                                                                                         | 100                                      | 14.3 | 0.30                 | 96.7                                                             | 14.6 | 0.17                 |
| Major depressive episode/dysthymia                                                                                                                                                                                                                                       | 99.5                                     | 14.6 | 0.92                 | 100                                                              | 14   | 0.55                 |
| Generalized anxiety disorder                                                                                                                                                                                                                                             | 98.1                                     | 16.1 | 0.92                 | 97.4                                                             | 13.3 | 0.17                 |
| No distress disorder                                                                                                                                                                                                                                                     | 98.1                                     | 14.4 | --                   | 99.8                                                             | 14.6 | --                   |
| <i>III. Behavior disorders</i>                                                                                                                                                                                                                                           |                                          |      |                      |                                                                  |      |                      |
| ADHD                                                                                                                                                                                                                                                                     | 96.1                                     | 16.1 | 0.002                | 96.2                                                             | 14   | 0.004                |
| Oppositional defiant disorder                                                                                                                                                                                                                                            | 96.6                                     | 14.9 | <.001                | 98.9                                                             | 15   | 0.14                 |
| Conduct disorder                                                                                                                                                                                                                                                         | 95.5                                     | 14.7 | <.001                | 96.2                                                             | 14.6 | 0.004                |
| Eating disorders                                                                                                                                                                                                                                                         | 97                                       | 15.1 | 0.002                | 98.2                                                             | 15   | 0.14                 |
| No behavior disorder                                                                                                                                                                                                                                                     | 100                                      | 14.5 | --                   | 100.1                                                            | 14.5 | --                   |
| <i>IV. Substance disorders</i>                                                                                                                                                                                                                                           |                                          |      |                      |                                                                  |      |                      |
| Alcohol abuse                                                                                                                                                                                                                                                            | 97.4                                     | 14.8 | 0.004                | 97.9                                                             | 14.8 | 0.11                 |
| Drug abuse                                                                                                                                                                                                                                                               | 98.3                                     | 14.3 | 0.03                 | 98.3                                                             | 13.2 | 0.11                 |
| No substance disorder                                                                                                                                                                                                                                                    | 99.8                                     | 14.6 | --                   | 99.8                                                             | 14.6 | --                   |
| <i>V. Other disorders</i>                                                                                                                                                                                                                                                |                                          |      |                      |                                                                  |      |                      |
| Bipolar disorder                                                                                                                                                                                                                                                         | 94.8                                     | 16.2 | 0.001                | 97.1                                                             | 16.3 | 0.41                 |
| No bipolar disorder                                                                                                                                                                                                                                                      | 99.6                                     | 14.6 | --                   | 99.7                                                             | 14.6 | --                   |
| <i>VI. Total number of disorders</i>                                                                                                                                                                                                                                     |                                          |      |                      |                                                                  |      |                      |
| Exactly one disorder                                                                                                                                                                                                                                                     | 98.7                                     | 13.6 | 0.40                 | 100.5                                                            | 14.5 | 0.10                 |
| Exactly two disorders                                                                                                                                                                                                                                                    | 98.9                                     | 13.8 | 0.40                 | 97.7                                                             | 13.7 | 0.10                 |
| Three or more disorders                                                                                                                                                                                                                                                  | 97.6                                     | 14.9 | 0.02                 | 96.6                                                             | 14.3 | 0.10                 |
| No disorder                                                                                                                                                                                                                                                              | 99.7                                     | 14.6 | --                   | 99.6                                                             | 14.6 | --                   |
| * Scores were first normed in the sample by six-month age groups for mean of 100 and standard deviation of 15.                                                                                                                                                           |                                          |      |                      |                                                                  |      |                      |
| ** Among those with a lifetime exposure to a potentially traumatic event (N=6160, 61.2% of the total sample)                                                                                                                                                             |                                          |      |                      |                                                                  |      |                      |
| + P-values are for the comparison between each disorder category to a reference group of no disorder in that category. For example, mean IQ among those with specific phobia is compared to those with no fear disorder. All p-values are false discovery rate adjusted. |                                          |      |                      |                                                                  |      |                      |

| eTable 3. Effect size estimates of the association between fluid intelligence and psychiatric disorders in a population representation sample of adolescents (N=10,073)* |                                          |              |                                                                  |             |  |
|--------------------------------------------------------------------------------------------------------------------------------------------------------------------------|------------------------------------------|--------------|------------------------------------------------------------------|-------------|--|
|                                                                                                                                                                          | <i>Past 12 month disorders, all ages</i> |              | <i>Prior to past 12-month but not current disorder, all ages</i> |             |  |
|                                                                                                                                                                          | d                                        | CI           | d                                                                | CI          |  |
| <i>I. Fear disorders</i>                                                                                                                                                 |                                          |              |                                                                  |             |  |
| Specific phobia                                                                                                                                                          | 0.12                                     | 0.07, 0.18   | 0.00                                                             | -0.11, 0.11 |  |
| Agoraphobia                                                                                                                                                              | 0.02                                     | -0.12, 0.16  | 0.06                                                             | -0.17, 0.29 |  |
| Social phobia                                                                                                                                                            | 0.03                                     | -0.03, 0.09  | 0.11                                                             | -0.05, 0.27 |  |
| Panic disorder                                                                                                                                                           | 0.05                                     | -0.09, 0.19  | 0.15                                                             | -0.15, 0.45 |  |
| <i>II. Distress disorders</i>                                                                                                                                            |                                          |              |                                                                  |             |  |
| Separation anxiety disorder                                                                                                                                              | 0.14                                     | -0.02, 0.29  | 0.11                                                             | -0.19, 0.41 |  |
| Post-traumatic stress disorder**                                                                                                                                         | -0.06                                    | -0.18, 0.06  | 0.14                                                             | -0.06, 0.34 |  |
| Major depressive episode/dysthymia                                                                                                                                       | -0.08                                    | -0.15, -0.01 | -0.06                                                            | -0.16, 0.04 |  |
| Generalized anxiety disorder                                                                                                                                             | 0.07                                     | -0.08, 0.23  | 0.16                                                             | -0.02, 0.34 |  |
| <i>III. Behavior disorders</i>                                                                                                                                           |                                          |              |                                                                  |             |  |
| ADHD                                                                                                                                                                     | 0.17                                     | 0.05, 0.3    | 0.14                                                             | -0.01, 0.29 |  |
| Oppositional defiant disorder                                                                                                                                            | 0.12                                     | 0.03, 0.21   | 0.03                                                             | -0.06, 0.12 |  |
| Conduct disorder                                                                                                                                                         | 0.14                                     | 0.03, 0.25   | 0.10                                                             | -0.03, 0.23 |  |
| Eating disorders                                                                                                                                                         | 0.08                                     | -0.03, 0.19  | 0.05                                                             | -0.08, 0.18 |  |
| <i>IV. Substance disorders</i>                                                                                                                                           |                                          |              |                                                                  |             |  |
| Alcohol abuse                                                                                                                                                            | 0.18                                     | 0.09, 0.27   | 0.10                                                             | -0.05, 0.25 |  |
| Drug abuse                                                                                                                                                               | 0.10                                     | 0.02, 0.19   | 0.09                                                             | -0.02, 0.2  |  |
| <i>V. Other disorders</i>                                                                                                                                                |                                          |              |                                                                  |             |  |
| Bipolar disorder                                                                                                                                                         | 0.31                                     | 0.12, 0.49   | 0.06                                                             | -0.36, 0.48 |  |
| <i>VI. Total number of disorders</i>                                                                                                                                     |                                          |              |                                                                  |             |  |
| Exactly one disorder                                                                                                                                                     | 0.04                                     | -0.07, 0.16  | -0.06                                                            | -0.17, 0.05 |  |
| Exactly two disorders                                                                                                                                                    | 0.04                                     | -0.09, 0.18  | 0.09                                                             | -0.04, 0.22 |  |
| Three or more disorders                                                                                                                                                  | 0.07                                     | -0.02, 0.16  | 0.20                                                             | 0.11, 0.29  |  |
| *Adjusted for parental education, parental income, poverty ratio, race/ethnicity, age, and nativity, number of siblings, birth order, and non-focal disorders            |                                          |              |                                                                  |             |  |
| ** Among those with a lifetime exposure to a potentially traumatic event (N=6160, 61.2% of the total sample).                                                            |                                          |              |                                                                  |             |  |

| eTable 4. Variation in fluid intelligence* by current disorder status, separating current disorders into those with onset in the past 12 months and those with onset prior to the past 12 months                                                                                                                                   |                                                       |      |       |          |                                                            |      |       |          |
|------------------------------------------------------------------------------------------------------------------------------------------------------------------------------------------------------------------------------------------------------------------------------------------------------------------------------------|-------------------------------------------------------|------|-------|----------|------------------------------------------------------------|------|-------|----------|
|                                                                                                                                                                                                                                                                                                                                    | <i>Past 12 month and Lifetime disorders, all ages</i> |      |       |          | <i>Past 12 month, but not Lifetime disorders, all ages</i> |      |       |          |
|                                                                                                                                                                                                                                                                                                                                    | Mean IQ                                               | SE   | Beta  | p value+ | Mean IQ                                                    | SE   | Beta  | p value+ |
| <i>I. Fear disorders</i>                                                                                                                                                                                                                                                                                                           |                                                       |      |       |          |                                                            |      |       |          |
| Specific phobia                                                                                                                                                                                                                                                                                                                    | 97.9                                                  | 0.39 | -1.3  | 0.005    | 96.7                                                       | 3.11 | -2.49 | 0.42     |
| Agoraphobia                                                                                                                                                                                                                                                                                                                        | 98.8                                                  | 0.98 | -0.45 | 0.65     | 87.5                                                       | 6.27 | -11.8 | 0.12     |
| Social phobia                                                                                                                                                                                                                                                                                                                      | 98.6                                                  | 0.43 | -0.51 | 0.50     | --                                                         | --   | --    | --       |
| Panic disorder                                                                                                                                                                                                                                                                                                                     | 98.4                                                  | 1.04 | -0.9  | 0.52     | --                                                         | --   | --    | --       |
| No fear disorder                                                                                                                                                                                                                                                                                                                   | 99.1                                                  | 0.22 | --    | --       | 99.1                                                       | 0.22 | --    | --       |
| <i>II. Distress disorders</i>                                                                                                                                                                                                                                                                                                      |                                                       |      |       |          |                                                            |      |       |          |
| Separation anxiety disorder                                                                                                                                                                                                                                                                                                        | 96.8                                                  | 1.13 | -1.89 | 0.20     | 98.3                                                       | 4.19 | -0.41 | 0.97     |
| Post-traumatic stress disorder**                                                                                                                                                                                                                                                                                                   | 99.7                                                  | 0.88 | 0.94  | 0.32     | 98.6                                                       | 4.38 | -0.19 | 0.97     |
| Major depressive episode/dysthymia                                                                                                                                                                                                                                                                                                 | 100                                                   | 0.5  | 1.32  | 0.04     | 96.8                                                       | 2.04 | -1.91 | 0.70     |
| Generalized anxiety disorder                                                                                                                                                                                                                                                                                                       | 97.6                                                  | 1.11 | -1.11 | 0.32     | 93.2                                                       | 4.16 | -5.53 | 0.67     |
| No distress disorder                                                                                                                                                                                                                                                                                                               | 98.8                                                  | 0.25 | --    | --       | 98.8                                                       | 0.25 | --    | --       |
| <i>III. Behavior disorders</i>                                                                                                                                                                                                                                                                                                     |                                                       |      |       |          |                                                            |      |       |          |
| ADHD                                                                                                                                                                                                                                                                                                                               | 96.3                                                  | 0.91 | -2.91 | 0.006    | 93.6                                                       | 9.8  | -5.63 | 0.90     |
| Oppositional defiant disorder                                                                                                                                                                                                                                                                                                      | 97.3                                                  | 0.66 | -1.81 | 0.01     | 99.2                                                       | 2    | 0.1   | 0.96     |
| Conduct disorder                                                                                                                                                                                                                                                                                                                   | 97.1                                                  | 0.82 | -1.96 | 0.02     | 98.3                                                       | 1.46 | -0.77 | 0.90     |
| Eating disorders                                                                                                                                                                                                                                                                                                                   | 97.9                                                  | 0.82 | -1.28 | 0.12     | --                                                         | --   | --    | --       |
| No behavior disorder                                                                                                                                                                                                                                                                                                               | 99.1                                                  | 0.21 | --    | --       | 99.1                                                       | 0.21 | --    | --       |
| <i>IV. Substance disorders</i>                                                                                                                                                                                                                                                                                                     |                                                       |      |       |          |                                                            |      |       |          |
| Alcohol abuse                                                                                                                                                                                                                                                                                                                      | 96.5                                                  | 0.67 | -2.6  | <.001    | 97.6                                                       | 2.16 | -1.47 | 0.93     |
| Drug abuse                                                                                                                                                                                                                                                                                                                         | 97.6                                                  | 0.64 | -1.45 | 0.02     | 98.9                                                       | 1.41 | -0.13 | 0.93     |
| No substance disorder                                                                                                                                                                                                                                                                                                              | 99.1                                                  | 0.21 | --    | --       | 99.1                                                       | 0.21 | --    | --       |
| <i>V. Other disorders</i>                                                                                                                                                                                                                                                                                                          |                                                       |      |       |          |                                                            |      |       |          |
| Bipolar disorder                                                                                                                                                                                                                                                                                                                   | 94.3                                                  | 1.69 | -4.88 | 0.004    | 106.6                                                      | 6.3  | 7.4   | 0.24     |
| No bipolar disorder                                                                                                                                                                                                                                                                                                                | 99.2                                                  | 0.21 | --    | --       | 99.2                                                       | 0.21 | --    | --       |
| <i>VI. Total number of disorders</i>                                                                                                                                                                                                                                                                                               |                                                       |      |       |          |                                                            |      |       |          |
| Exactly one disorder                                                                                                                                                                                                                                                                                                               | 98.1                                                  | 0.34 | -1.32 | <.001    | 97.8                                                       | 0.77 | -1.03 | 0.05     |
| Exactly two disorders                                                                                                                                                                                                                                                                                                              | 98.1                                                  | 0.48 | -1.37 | 0.006    | 97.6                                                       | 2.98 | -1.29 | 0.66     |
| Three or more disorders                                                                                                                                                                                                                                                                                                            | 97                                                    | 0.49 | -2.48 | <.001    | 90.5                                                       | 9.86 | -8.38 | 0.59     |
| No disorder                                                                                                                                                                                                                                                                                                                        | 99.6                                                  | 0.25 | --    | --       | 99.6                                                       | 0.25 | --    | --       |
| * Scores were first normed in the sample by six-month age groups for mean of 100 and standard deviation of 15. Predicted means were estimated from linear regression models controlling for parental education; race/ethnicity, age, nativity (US born versus not), number of siblings, birth order, and non-focal disorder groups |                                                       |      |       |          |                                                            |      |       |          |
| ** Among those with a lifetime exposure to a potentially traumatic event (N=6160, 61.2% of the total sample)                                                                                                                                                                                                                       |                                                       |      |       |          |                                                            |      |       |          |
| + P-values are for the comparison between each disorder category to a reference group of no disorder in that category. For example, mean IQ among those with specific phobia is compared to those with no fear                                                                                                                     |                                                       |      |       |          |                                                            |      |       |          |

disorder. All p-values are false discovery rate adjusted.

| eTable 5. Variation in fluid intelligence* as a function of lifetime psychiatric disorders (N=10,073)                                                                                                                                                                                                                              |         |      |                      |       |             |
|------------------------------------------------------------------------------------------------------------------------------------------------------------------------------------------------------------------------------------------------------------------------------------------------------------------------------------|---------|------|----------------------|-------|-------------|
|                                                                                                                                                                                                                                                                                                                                    | Mean IQ | SE   | p value <sup>+</sup> | d     | CI          |
| <i>I. Fear disorders</i>                                                                                                                                                                                                                                                                                                           |         |      |                      |       |             |
| Specific phobia                                                                                                                                                                                                                                                                                                                    | 97.7    | 0.35 | 0.004                | 0.1   | 0.05, 0.14  |
| Agoraphobia                                                                                                                                                                                                                                                                                                                        | 98.2    | 0.83 | 0.44                 | 0.06  | -0.06, 0.17 |
| Social phobia                                                                                                                                                                                                                                                                                                                      | 98.1    | 0.4  | 0.07                 | 0.07  | 0.01, 0.12  |
| Panic disorder                                                                                                                                                                                                                                                                                                                     | 97.3    | 0.93 | 0.14                 | 0.13  | 0, 0.26     |
| No fear disorder                                                                                                                                                                                                                                                                                                                   | 99.1    | 0.22 | --                   | --    |             |
| <i>II. Distress disorders</i>                                                                                                                                                                                                                                                                                                      |         |      |                      |       |             |
| Separation anxiety disorder                                                                                                                                                                                                                                                                                                        | 97      | 0.53 | 0.004                | 0.12  | 0.03, 0.22  |
| Post-traumatic stress disorder**                                                                                                                                                                                                                                                                                                   | 98.2    | 0.75 | 0.58                 | 0.04  | -0.08, 0.16 |
| Major depressive episode/dysthymia                                                                                                                                                                                                                                                                                                 | 99.1    | 0.41 | 0.52                 | -0.02 | -0.1, 0.06  |
| Generalized anxiety disorder                                                                                                                                                                                                                                                                                                       | 96.7    | 0.83 | 0.02                 | 0.14  | 0.01, 0.27  |
| No distress disorder                                                                                                                                                                                                                                                                                                               | 99      | 0.21 | --                   | --    |             |
| <i>III. Behavior disorders</i>                                                                                                                                                                                                                                                                                                     |         |      |                      |       |             |
| ADHD                                                                                                                                                                                                                                                                                                                               | 96.1    | 0.69 | <.001                | 0.2   | 0.11, 0.3   |
| Oppositional defiant disorder                                                                                                                                                                                                                                                                                                      | 97.5    | 0.46 | 0.003                | 0.11  | 0.05, 0.18  |
| Conduct disorder                                                                                                                                                                                                                                                                                                                   | 96.4    | 0.6  | <.001                | 0.19  | 0.11, 0.27  |
| Eating disorders                                                                                                                                                                                                                                                                                                                   | 97.6    | 0.61 | 0.05                 | 0.11  | 0.02, 0.19  |
| No behavior disorder                                                                                                                                                                                                                                                                                                               | 99.2    | 0.21 | --                   | --    |             |
| <i>IV. Substance disorders</i>                                                                                                                                                                                                                                                                                                     |         |      |                      |       |             |
| Alcohol abuse                                                                                                                                                                                                                                                                                                                      | 96.2    | 0.58 | <.001                | 0.2   | 0.12, 0.27  |
| Drug abuse                                                                                                                                                                                                                                                                                                                         | 97.3    | 0.51 | 0.001                | 0.13  | 0.06, 0.2   |
| No substance disorder                                                                                                                                                                                                                                                                                                              | 99.1    | 0.21 | --                   | --    |             |
| <i>V. Other disorders</i>                                                                                                                                                                                                                                                                                                          |         |      |                      |       |             |
| Bipolar disorder                                                                                                                                                                                                                                                                                                                   | 95.55   | 1.22 | 0.007                | 0.21  | 0.04, 0.38  |
| No bipolar disorder                                                                                                                                                                                                                                                                                                                | 98.9    | 0.2  | --                   | --    |             |
| <i>VI. Total number of disorders</i>                                                                                                                                                                                                                                                                                               |         |      |                      |       |             |
| No disorder                                                                                                                                                                                                                                                                                                                        | 98.8    | 0.21 | --                   | --    |             |
| Exactly one disorder                                                                                                                                                                                                                                                                                                               | 98.7    | 0.42 | 0.17                 | 0.04  | -0.08, 0.15 |
| Exactly two disorders                                                                                                                                                                                                                                                                                                              | 98.7    | 0.52 | 0.22                 | 0.04  | -0.1, 0.17  |
| Three or more disorders                                                                                                                                                                                                                                                                                                            | 97.7    | 0.37 | <.001                | 0.1   | 0.03, 0.18  |
| * Scores were first normed in the sample by six-month age groups for mean of 100 and standard deviation of 15. Predicted means were estimated from linear regression models controlling for parental education; race/ethnicity, age, nativity (US born versus not), number of siblings, birth order, and non-focal disorder groups |         |      |                      |       |             |
| ** Among those with a lifetime exposure to a potentially traumatic event (N=6160, 61.2% of the total sample)                                                                                                                                                                                                                       |         |      |                      |       |             |
| <sup>+</sup> P-values are for the comparison between each disorder category to a reference group of no disorder in that category. For example, mean IQ among those with specific phobia is compared to those with no fear disorder. All p-values are false discovery rate adjusted.                                                |         |      |                      |       |             |

| eTable 6. Proportion of adolescents with fluid intelligence in low, middle, and high range, separating current disorders into those with onset in the past 12 months and those with onset prior to the past 12 months |                                                       |                     |                   |                      |                                                  |                   |                      |
|-----------------------------------------------------------------------------------------------------------------------------------------------------------------------------------------------------------------------|-------------------------------------------------------|---------------------|-------------------|----------------------|--------------------------------------------------|-------------------|----------------------|
|                                                                                                                                                                                                                       | <i>Past 12 month and Lifetime disorders, all ages</i> |                     |                   |                      | <i>Past 12 months but not lifetime, all ages</i> |                   |                      |
| <i>Range (N total)</i>                                                                                                                                                                                                | Low (n=1852) (%)                                      | Middle (n=6757) (%) | High (n=1464) (%) | p-value <sup>+</sup> | Middle (n=6757) (%)                              | High (n=1464) (%) | p-value <sup>+</sup> |
| <i>I. Fear disorders</i>                                                                                                                                                                                              |                                                       |                     |                   |                      |                                                  |                   |                      |
| Specific phobia                                                                                                                                                                                                       | 22.5                                                  | 65.13               | 12.38             | <.001                | 76.19                                            | 0                 | 0.14                 |
| Agoraphobia                                                                                                                                                                                                           | 25.35                                                 | 58.06               | 16.59             | 0.009                | 40                                               | 0                 | 0.08                 |
| Social phobia                                                                                                                                                                                                         | 20.11                                                 | 66.61               | 13.28             | 0.035                | 0                                                | 0                 | --                   |
| Panic disorder                                                                                                                                                                                                        | 18.32                                                 | 71.2                | 10.47             | 0.19                 | 0                                                | 0                 | --                   |
| Any fear disorder                                                                                                                                                                                                     | 21.02                                                 | 66.13               | 12.85             | <.001                | 69.23                                            | 0                 | 0.08                 |
| No fear disorder                                                                                                                                                                                                      | 17.52                                                 | 67.39               | 15.09             | --                   | 67.07                                            | 14.57             | --                   |
| <i>II. Distress disorders</i>                                                                                                                                                                                         |                                                       |                     |                   |                      |                                                  |                   |                      |
| Separation anxiety disorder                                                                                                                                                                                           | 25.93                                                 | 66.05               | 8.02              | 0.06                 | 58.33                                            | 8.33              | 0.64                 |
| Post-traumatic stress disorder**                                                                                                                                                                                      | 17.36                                                 | 67.36               | 15.28             | 0.76                 | 63.64                                            | 9.09              | 0.71                 |
| Major depressive episode/dysthymia                                                                                                                                                                                    | 19.18                                                 | 67.23               | 13.59             | 0.76                 | 68.09                                            | 6.38              | 0.44                 |
| Generalized anxiety disorder                                                                                                                                                                                          | 23.3                                                  | 63.07               | 13.64             | 0.39                 | 63.64                                            | 9.09              | 0.71                 |
| Any distress disorder                                                                                                                                                                                                 | 20.24                                                 | 66.48               | 13.28             | 0.29                 | 65                                               | 7.5               | 0.20                 |
| No distress disorder                                                                                                                                                                                                  | 18.12                                                 | 67.17               | 14.71             | --                   | 67.1                                             | 14.59             | --                   |
| <i>III. Behavior disorders</i>                                                                                                                                                                                        |                                                       |                     |                   |                      |                                                  |                   |                      |
| ADHD                                                                                                                                                                                                                  | 28.34                                                 | 60.32               | 11.34             | <.001                | 50                                               | 0                 | 0.59                 |
| Oppositional defiant disorder                                                                                                                                                                                         | 23.16                                                 | 67.21               | 9.63              | <.001                | 65.31                                            | 14.29             | 0.85                 |
| Conduct disorder                                                                                                                                                                                                      | 27.03                                                 | 64.86               | 8.11              | <.001                | 73.63                                            | 7.69              | 0.58                 |
| Eating disorders                                                                                                                                                                                                      | 24.44                                                 | 62.7                | 12.86             | 0.005                | 0                                                | 0                 | --                   |
| Any behavior disorder                                                                                                                                                                                                 | 24.64                                                 | 64.55               | 10.8              | <.001                | 70.71                                            | 10                | 0.59                 |
| No behavior disorder                                                                                                                                                                                                  | 17.6                                                  | 67.4                | 15                | --                   | 67.03                                            | 14.6              | --                   |
| <i>IV. Substance disorders</i>                                                                                                                                                                                        |                                                       |                     |                   |                      |                                                  |                   |                      |
| Alcohol abuse                                                                                                                                                                                                         | 21.83                                                 | 68.25               | 9.92              | 0.007                | 61.9                                             | 11.9              | 0.39                 |
| Drug abuse                                                                                                                                                                                                            | 19.53                                                 | 68.61               | 11.86             | 0.12                 | 76                                               | 9                 | 0.36                 |
| Any substance disorder                                                                                                                                                                                                | 20.47                                                 | 68.59               | 10.94             | 0.007                | 71.85                                            | 9.63              | 0.38                 |
| No substance disorder                                                                                                                                                                                                 | 18.19                                                 | 66.94               | 14.87             | --                   | 67.02                                            | 14.6              | --                   |
| <i>V. Other disorders</i>                                                                                                                                                                                             |                                                       |                     |                   |                      |                                                  |                   |                      |



|                                                                                                                                                                                                                                                                                  |       |       |       |           |       |       |      |
|----------------------------------------------------------------------------------------------------------------------------------------------------------------------------------------------------------------------------------------------------------------------------------|-------|-------|-------|-----------|-------|-------|------|
| Bipolar disorder                                                                                                                                                                                                                                                                 | 28.32 | 61.06 | 10.62 | 0.01      | 60    | 20    | 0.94 |
| No bipolar disorder                                                                                                                                                                                                                                                              | 18.02 | 66.87 | 15.12 | --        | 66.87 | 15.12 | --   |
| <i>VI. Total number of disorders</i>                                                                                                                                                                                                                                             |       |       |       |           |       |       |      |
| Exactly one disorder                                                                                                                                                                                                                                                             | 19.51 | 67.38 | 13.11 | 0.00<br>1 | 70.23 | 8.96  | 0.02 |
| Exactly two disorders                                                                                                                                                                                                                                                            | 21.58 | 64.97 | 13.45 | 0.00<br>1 | 68.18 | 9.09  | 0.70 |
| Three or more disorders                                                                                                                                                                                                                                                          | 23.28 | 65.92 | 10.8  | <.00<br>1 | 50    | 0     | 0.64 |
| Any disorder                                                                                                                                                                                                                                                                     | 20.88 | 66.47 | 12.66 | <.00<br>1 | 70    | 8.92  | 0.02 |
| No disorder                                                                                                                                                                                                                                                                      | 16.84 | 67.46 | 15.7  | --        | 66.97 | 14.75 | --   |
| ** Among those with a lifetime exposure to a potentially traumatic event (N=6160, 61.2% of the total sample)                                                                                                                                                                     |       |       |       |           |       |       |      |
| † P-values are for chi-square comparisons between each disorder category to a reference group of no disorder in that category. For example, mean IQ among those with specific phobia is compared to those with no fear disorder. All p-values are false discovery rate adjusted. |       |       |       |           |       |       |      |

| eTable 7. Unadjusted mean differences in IQ by psychiatric disorder among US adolescents by disorder age of onset |               |      |                      |                |      |                      |                 |      |                      |
|-------------------------------------------------------------------------------------------------------------------|---------------|------|----------------------|----------------|------|----------------------|-----------------|------|----------------------|
|                                                                                                                   | Onset age 4-8 |      |                      | Onset age 9-12 |      |                      | Onset age 13-17 |      |                      |
|                                                                                                                   | Mean IQ       | SD   | p value <sup>+</sup> | Mean IQ        | SD   | p value <sup>+</sup> | Mean IQ         | SD   | p value <sup>+</sup> |
| <i>I. Fear disorders</i>                                                                                          |               |      |                      |                |      |                      |                 |      |                      |
| Specific phobia                                                                                                   | 98.1          | 14.6 | <.001                | 96.3           | 15.1 | <.001                | 96.9            | 16   | 0.19                 |
| Agoraphobia                                                                                                       | 97.6          | 15.7 | 0.08                 | 96.6           | 17   | 0.02                 | 95.6            | 15.5 | 0.06                 |
| Social phobia                                                                                                     | 98.4          | 14.4 | 0.01                 | 99.3           | 15.1 | 0.15                 | 95.6            | 13.9 | <.001                |
| Panic disorder                                                                                                    | 99.7          | 13.3 | 0.79                 | 96.3           | 13.6 | 0.02                 | 97.1            | 14.9 | 0.11                 |
| No fear disorder                                                                                                  | 100.1         | 14.5 | --                   | 100.1          | 14.5 | --                   | 100.1           | 14.5 | --                   |
| <i>II. Distress disorders</i>                                                                                     |               |      |                      |                |      |                      |                 |      |                      |
| Separation anxiety disorder                                                                                       | 96.9          | 14.8 | <.001                | 96.8           | 13.9 | 0.02                 | 94.6            | 15.5 | 0.004                |
| Post-traumatic stress disorder**                                                                                  | 99            | 13.4 | 0.89                 | 98.8           | 16.4 | 0.78                 | 99.5            | 13.8 | 0.87                 |
| Major depressive episode/dysthymia                                                                                | 99.4          | 15   | 0.89                 | 100.5          | 14   | 0.13                 | 99.1            | 14.6 | 0.87                 |
| Generalized anxiety disorder                                                                                      | 98.5          | 14.1 | 0.89                 | 99.9           | 13.2 | 0.78                 | 96              | 16.4 | 0.02                 |
| No distress disorder                                                                                              | 99.2          | 14.5 | --                   | 99.2           | 14.5 | --                   | 99.2            | 14.5 | --                   |
| <i>III. Behavior disorders</i>                                                                                    |               |      |                      |                |      |                      |                 |      |                      |
| ADHD                                                                                                              | 97.6          | 14.7 | 0.01                 | 92.3           | 16.3 | <.001                | 89              | 15.5 | 0.002                |
| Oppositional defiant disorder                                                                                     | 98.1          | 15.3 | 0.03                 | 98.2           | 14.6 | 0.02                 | 97.1            | 15.4 | 0.002                |
| Conduct disorder                                                                                                  | 102.5         | 13.6 | 0.03                 | 98.7           | 14.5 | 0.07                 | 97.5            | 14.6 | 0.003                |
| Eating disorders                                                                                                  | 95            | 16.4 | 0.03                 | 97.4           | 15.2 | 0.02                 | 97.9            | 14.9 | 0.009                |
| No behavior disorder                                                                                              | 100.1         | 14.5 | --                   | 100.1          | 14.5 | --                   | 100.1           | 14.5 | --                   |
| <i>IV. Substance disorders</i>                                                                                    |               |      |                      |                |      |                      |                 |      |                      |
| Alcohol abuse                                                                                                     | 109.8         | 11.1 | 0.18                 | 97.4           | 14.7 | 0.40                 | 97.5            | 14.8 | 0.002                |
| Drug abuse                                                                                                        | 84.4          | 3.8  | 0.07                 | 98.4           | 13.7 | 0.40                 | 98.3            | 13.9 | 0.007                |
| No substance disorder                                                                                             | 99.8          | 14.6 | --                   | 99.8           | 14.6 | --                   | 99.8            | 14.6 | --                   |
| <i>V. Other disorders</i>                                                                                         |               |      |                      |                |      |                      |                 |      |                      |
| Bipolar disorder                                                                                                  | 92.7          | 15.9 | 0.03                 | 96.3           | 16.9 | 0.12                 | 95.1            | 15.8 | 0.01                 |
| No bipolar disorder                                                                                               | 99.7          | 14.6 | --                   | 99.7           | 14.6 | --                   | 99.7            | 14.6 | --                   |
| ** Among those with a lifetime exposure to a potentially traumatic event (N=6160, 61.2% of                        |               |      |                      |                |      |                      |                 |      |                      |

|                                                                                                                                                                                                                                                                          |  |  |
|--------------------------------------------------------------------------------------------------------------------------------------------------------------------------------------------------------------------------------------------------------------------------|--|--|
| the total sample)                                                                                                                                                                                                                                                        |  |  |
| + P-values are for the comparison between each disorder category to a reference group of no disorder in that category. For example, mean IQ among those with specific phobia is compared to those with no fear disorder. All p-values are false discovery rate adjusted. |  |  |

| eTable 8. Proportion of adolescents with fluid intelligence in low, middle, and high range as a function of psychiatric disorder age of onset (unadjusted) (N=10,073) |               |            |          |                      |                |            |          |                      |                 |            |          |                      |
|-----------------------------------------------------------------------------------------------------------------------------------------------------------------------|---------------|------------|----------|----------------------|----------------|------------|----------|----------------------|-----------------|------------|----------|----------------------|
|                                                                                                                                                                       | Onset age 4-8 |            |          |                      | Onset age 9-12 |            |          |                      | Onset age 13-17 |            |          |                      |
|                                                                                                                                                                       | Low (%)       | Middle (%) | High (%) | p-value <sup>†</sup> | Low (%)        | Middle (%) | High (%) | p-value <sup>†</sup> | Low (%)         | Middle (%) | High (%) | p-value <sup>†</sup> |
| <i>I. Fear disorders</i>                                                                                                                                              |               |            |          |                      |                |            |          |                      |                 |            |          |                      |
| Specific phobia                                                                                                                                                       | 20.76         | 66.58      | 12.65    | ****                 | 24.13          | 64.76      | 11.11    | **                   | 25.71           | 65.71      | 8.57     | *                    |
| Agoraphobia                                                                                                                                                           | 22.4          | 60         | 17.6     | *                    | 24.79          | 60.68      | 14.53    | *                    | 33.33           | 52.08      | 14.58    | **                   |
| Social phobia                                                                                                                                                         | 20.14         | 67.45      | 12.41    | *                    | 19.69          | 64.22      | 16.09    | *                    | 23.66           | 67.41      | 8.93     | **                   |
| Panic disorder                                                                                                                                                        | 19.23         | 70.51      | 10.26    | *                    | 19.77          | 69.77      | 10.47    | *                    | 21.13           | 69.01      | 9.86     | *                    |
| Any fear disorder                                                                                                                                                     | 20.73         | 66.34      | 12.82    | ****                 | 20.73          | 66.34      | 12.82    | ****                 | 20.73           | 66.34      | 12.82    | ****                 |
| No fear disorder                                                                                                                                                      | 17.43         | 67.34      | 15.23    | --                   | 17.43          | 67.34      | 15.23    | --                   | 17.43           | 67.34      | 15.23    | --                   |
| <i>II. Distress disorders</i>                                                                                                                                         |               |            |          |                      |                |            |          |                      |                 |            |          |                      |
| Separation anxiety disorder                                                                                                                                           | 23.35         | 64.88      | 11.78    | ***                  | 21.39          | 68.45      | 10.16    | *                    | 33.7            | 56.52      | 9.78     | ****                 |
| Post-traumatic stress disorder <sup>1</sup>                                                                                                                           | 17.76         | 70.09      | 12.15    | *                    | 21.57          | 58.82      | 19.61    | *                    | 18.97           | 67.82      | 13.22    | *                    |
| Major depressive episode/dysthymia                                                                                                                                    | 18.36         | 68.12      | 13.53    | *                    | 16.36          | 69.09      | 14.55    | *                    | 20.31           | 66.11      | 13.59    |                      |
| Generalized anxiety disorder                                                                                                                                          | 15.15         | 71.21      | 13.64    | *                    | 14.29          | 73.47      | 12.24    | *                    | 31.58           | 54.14      | 14.29    | ****                 |
| Any distress disorder                                                                                                                                                 | 18.46         | 66.45      | 15.09    | *                    | 18.46          | 66.45      | 15.09    | *                    | 18.46           | 66.45      | 15.09    | *                    |
| No distress disorder                                                                                                                                                  | 18.29         | 67.87      | 13.84    | --                   | 18.29          | 67.87      | 13.84    | --                   | 18.29           | 67.87      | 13.84    | --                   |
| <i>III. Behavior disorders</i>                                                                                                                                        |               |            |          |                      |                |            |          |                      |                 |            |          |                      |
| ADHD                                                                                                                                                                  | 23.24         | 65.44      | 11.31    | **                   | 33.33          | 58.97      | 7.69     | ***                  | 52.17           | 39.13      | 8.7      | ****                 |
| Oppositional defiant disorder                                                                                                                                         | 20.07         | 67.07      | 12.59    | *                    | 21.4           | 66.51      | 12.09    | *                    | 24.84           | 61.64      | 13.52    | **                   |
| Conduct disorder                                                                                                                                                      | 11.41         | 70.11      | 18.48    | **                   | 20.05          | 67.45      | 12.5     | *                    | 20.88           | 68.01      | 11.11    | *                    |
| Eating disorders                                                                                                                                                      | 35.71         | 47.62      | 16.67    | ***                  | 23.71          | 65.46      | 10.82    | *                    | 20.89           | 65.51      | 13.61    | *                    |
| Any behavior disorder                                                                                                                                                 | 22.89         | 64.67      | 12.44    | ****                 | 22.89          | 64.67      | 12.44    | ****                 | 22.89           | 64.67      | 12.44    | ****                 |
| No behavior disorder                                                                                                                                                  | 17.29         | 67.67      | 15.04    | --                   | 17.29          | 67.67      | 15.04    | --                   | 17.29           | 67.67      | 15.04    | --                   |
| <i>IV. Substance disorders</i>                                                                                                                                        |               |            |          |                      |                |            |          |                      |                 |            |          |                      |
| Alcohol abuse                                                                                                                                                         | --            | 75         | 25       | --                   | 21.57          | 70.59      | 7.84     | *                    | 21.81           | 68.01      | 10.18    | ***                  |
| Drug abuse                                                                                                                                                            | 50            | 50         | --       | --                   | 20.99          | 72.84      | 6.17     | *                    | 19.22           | 69.41      | 11.38    | **                   |

|                                                                                                                                                                                                                                                                                                                                                   |           |           |           |      |           |           |           |      |           |           |           |      |
|---------------------------------------------------------------------------------------------------------------------------------------------------------------------------------------------------------------------------------------------------------------------------------------------------------------------------------------------------|-----------|-----------|-----------|------|-----------|-----------|-----------|------|-----------|-----------|-----------|------|
| Any substance disorder                                                                                                                                                                                                                                                                                                                            | 19.<br>98 | 69.4<br>2 | 10.<br>59 | **** | 19.<br>98 | 69.4<br>2 | 10.<br>59 | **** | 19.<br>98 | 69.4<br>2 | 10.<br>59 | **** |
| No substance disorder                                                                                                                                                                                                                                                                                                                             | 18.<br>18 | 66.7<br>8 | 15.<br>05 | --   | 18.<br>18 | 66.7<br>8 | 15.<br>05 | --   | 18.<br>18 | 66.7<br>8 | 15.<br>05 | --   |
| <i>V. Other disorders</i>                                                                                                                                                                                                                                                                                                                         |           |           |           |      |           |           |           |      |           |           |           |      |
| Bipolar disorder                                                                                                                                                                                                                                                                                                                                  | 35        | 55        | 10        | *    | 25.<br>53 | 63.8<br>3 | 10.<br>64 | *    | 27.<br>94 | 63.2<br>4 | 8.8<br>2  | *    |
| No bipolar disorder                                                                                                                                                                                                                                                                                                                               | 18.<br>25 | 67.1<br>5 | 14.<br>6  | --   | 18.<br>25 | 67.1<br>5 | 14.<br>6  | --   | 18.<br>25 | 67.1<br>5 | 14.<br>6  | --   |
| <sup>1</sup> Among those with a lifetime exposure to a potentially traumatic event (N=6160, 61.2% of the total sample)                                                                                                                                                                                                                            |           |           |           |      |           |           |           |      |           |           |           |      |
| <sup>+</sup> P-values are for chi-square comparisons between each disorder category to a reference group of no disorder in that category. For example, mean IQ among those with specific phobia is compared to those with no fear disorder. All p-values are false discovery rate adjusted. * = p<0.05; ** = p<0.05; *** = p<0.01; **** = p<0.001 |           |           |           |      |           |           |           |      |           |           |           |      |

| eTable 9. Adjusted IQ differences as a function of psychiatric disorder age of onset in a population representation sample of adolescents (N=10,073) |               |      |                      |                |      |                      |                 |      |                      |
|------------------------------------------------------------------------------------------------------------------------------------------------------|---------------|------|----------------------|----------------|------|----------------------|-----------------|------|----------------------|
|                                                                                                                                                      | Onset age 4-8 |      |                      | Onset age 9-12 |      |                      | Onset age 13-17 |      |                      |
|                                                                                                                                                      | Mean IQ       | SE   | p value <sup>+</sup> | Mean IQ        | SE   | p value <sup>+</sup> | Mean IQ         | SE   | p value <sup>+</sup> |
| <i>I. Fear disorders</i>                                                                                                                             |               |      |                      |                |      |                      |                 |      |                      |
| Specific phobia                                                                                                                                      | 98.2          | 0.38 | 0.56                 | 97.6           | 0.8  | 0.63                 | 96.6            | 2.4  | 0.80                 |
| Agoraphobia                                                                                                                                          | 99.1          | 1.27 | 0.56                 | 98.6           | 1.32 | 0.63                 | 97.9            | 2.03 | 0.80                 |
| Social phobia                                                                                                                                        | 98.3          | 0.61 | 0.02                 | 99.3           | 0.58 | 0.35                 | 96.4            | 0.96 | 0.03                 |
| Panic disorder                                                                                                                                       | 99.9          | 1.6  | 0.56                 | 96.3           | 1.53 | 0.63                 | 98.3            | 1.67 | 0.75                 |
| No fear disorder                                                                                                                                     | 99.1          | 0.22 | --                   | 99.1           | 0.22 | --                   | 99.1            | 0.22 | --                   |
| <i>II. Distress disorders</i>                                                                                                                        |               |      |                      |                |      |                      |                 |      |                      |
| Separation anxiety disorder                                                                                                                          | 97.4          | 0.66 | 0.08                 | 98.1           | 1.04 | 0.68                 | 95.9            | 1.46 | 0.28                 |
| Post-traumatic stress disorder**                                                                                                                     | 98.5          | 1.37 | 0.70                 | 99.1           | 1.41 | 0.68                 | 99.2            | 1.12 | 0.96                 |
| Major depressive episode/dysthymia                                                                                                                   | 99.8          | 1.01 | 0.70                 | 100.2          | 0.67 | 0.68                 | 99.1            | 0.59 | 0.28                 |
| Generalized anxiety disorder                                                                                                                         | 98.8          | 1.76 | 0.04                 | 98.6           | 1.44 | 0.47                 | 95.5            | 1.25 | 0.28                 |
| No distress disorder                                                                                                                                 | 98.8          | 0.25 | --                   | 98.8           | 0.25 | --                   | 98.8            | 0.25 | --                   |
| <i>III. Behavior disorders</i>                                                                                                                       |               |      |                      |                |      |                      |                 |      |                      |
| ADHD                                                                                                                                                 | 97.5          | 0.8  | 0.11                 | 94.2           | 1.6  | 0.21                 | 92.8            | 2.9  | 0.67                 |
| Oppositional defiant disorder                                                                                                                        | 97.6          | 0.84 | 0.15                 | 98.6           | 0.69 | 0.94                 | 97.7            | 0.81 | 0.67                 |
| Conduct disorder                                                                                                                                     | 101.1         | 1.03 | 0.40                 | 98.9           | 0.73 | 0.15                 | 98.4            | 0.83 | 0.67                 |
| Eating disorders                                                                                                                                     | 95.4          | 2.14 | 0.50                 | 97.9           | 1.02 | 0.21                 | 98.7            | 0.82 | 0.67                 |
| No behavior disorder                                                                                                                                 | 99.1          | 0.21 | --                   | 99.1           | 0.21 | --                   | 99.1            | 0.21 | --                   |
| <i>IV. Substance disorders</i>                                                                                                                       |               |      |                      |                |      |                      |                 |      |                      |
| Alcohol abuse                                                                                                                                        | 110.7         | 6.98 | <.001                | 97.1           | 1.97 | 0.09                 | 96.6            | 0.62 | 0.81                 |
| Drug abuse                                                                                                                                           | 87.1          | 6.95 | 0.01                 | 98.6           | 1.57 | 0.13                 | 97.7            | 0.55 | 0.81                 |
| No substance disorder                                                                                                                                | 99            | 0.21 | --                   | 99             | 0.21 | --                   | 99              | 0.21 | --                   |
| <i>V. Other disorders</i>                                                                                                                            |               |      |                      |                |      |                      |                 |      |                      |
| Bipolar disorder                                                                                                                                     | 94            | 3.12 | 0.16                 | 98.4           | 2.05 | 0.49                 | 96.4            | 1.73 | 0.47                 |
| No bipolar disorder                                                                                                                                  | 98.9          | 0.2  | --                   | 98.9           | 0.2  | --                   | 98.9            | 0.2  | --                   |
